# Supplementary material
Source: PubMed Central journal article supplement (PMC7672785)

Distribution of average ICI per small exonic variant

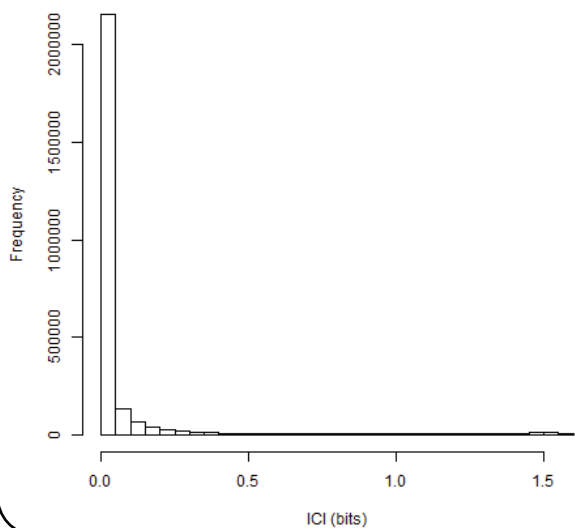

Distribution of maximum ICI per small exonic variant

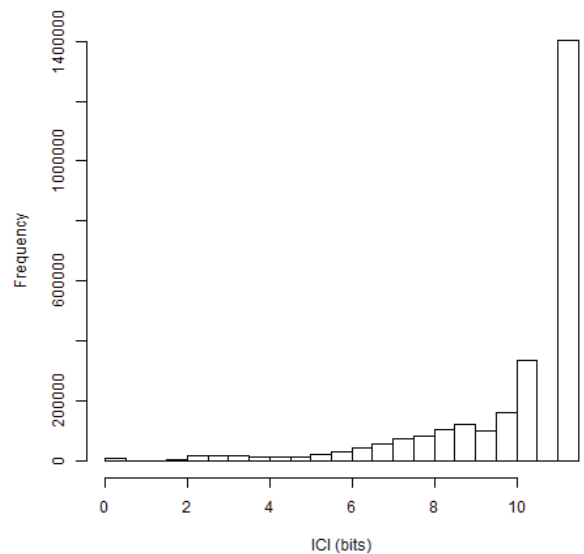

Distribution of average ICI per small exonic SNP

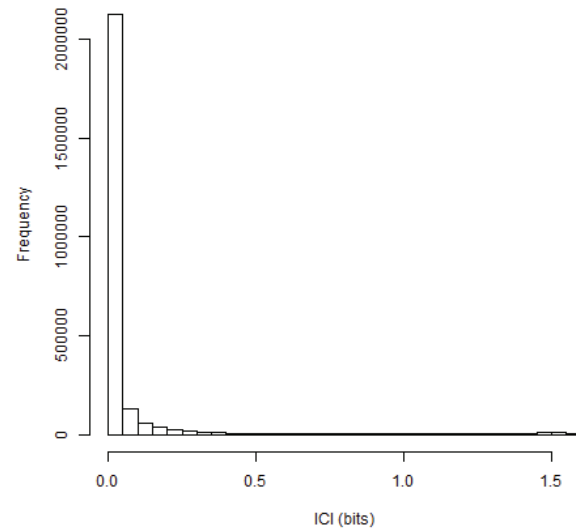

Distribution of maximum ICI per small exonic SNP

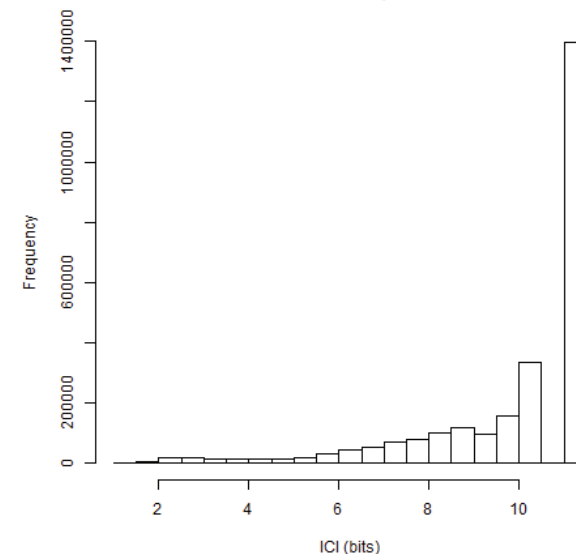

(2) Signal profile leakage

(1) Raw read leakages

(3) eQTL leakage

Distribution of average ICI per small exonic deletion

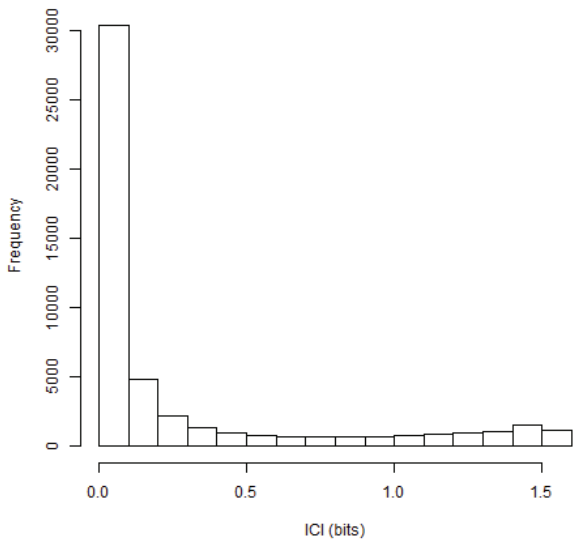

Distribution of maximum ICI per small exonic deletion

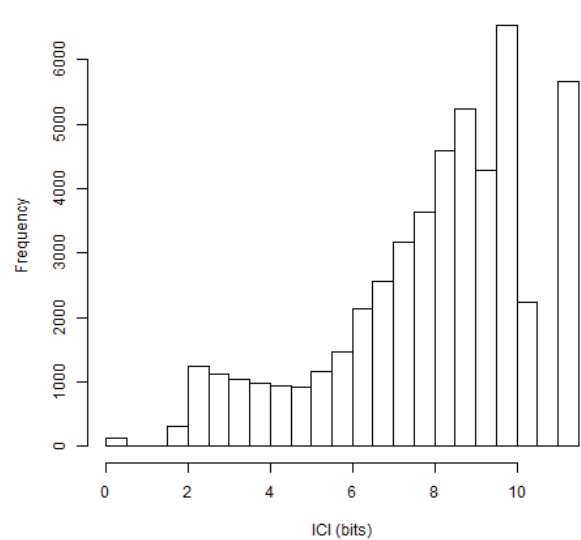

Distribution of average ICI per QTL

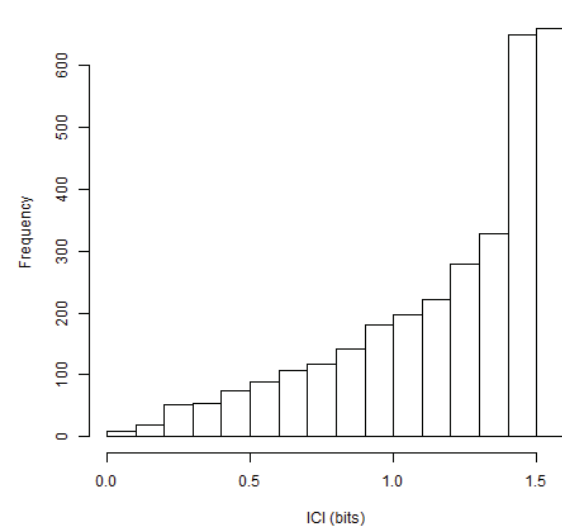

Distribution of maximum ICI per QTL

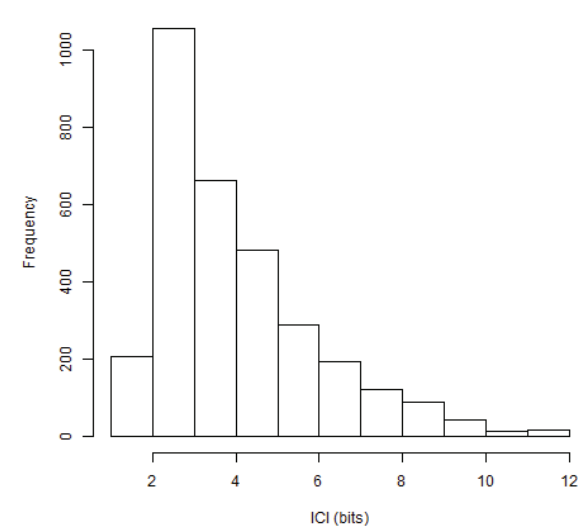

Supplement: NIHMS1633743-supplement-06.pdf [file NIHMS1633743-supplement-06.pdf]
