# Supplementary material
Source: PubMed Central journal article supplement (PMC7672785)
Supplement: NIHMS1633743-supplement-07.pdf [file NIHMS1633743-supplement-07.pdf]

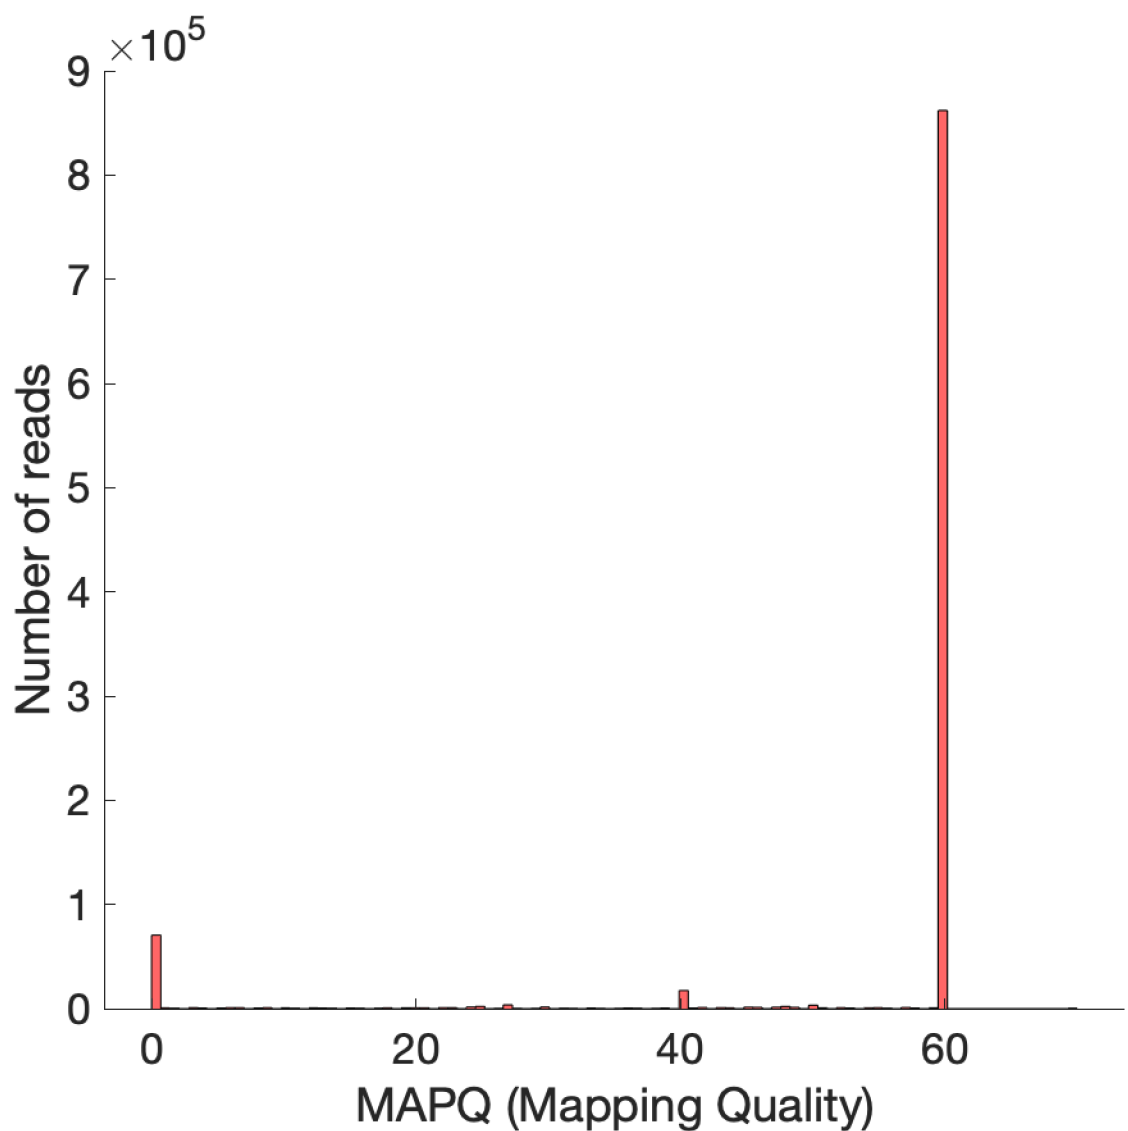

Observed = # of reads with cigar feature below cut-off / # of reads with cigar feature total

Expected = # of reads below cut-off / # of total reads

MAPQ <= 10

Cigar Features

|                     | X | I    | D    | S    | H     |
|---------------------|---|------|------|------|-------|
| Observed / Expected | 0 | 2.59 | 1.69 | 2.31 | 10.66 |

MAPQ <= 20

|                     | X | I    | D    | S    | H     |
|---------------------|---|------|------|------|-------|
| Observed / Expected | 0 | 2.58 | 1.79 | 2.42 | 10.33 |

MAPQ <= 30

|                     | X | I    | D    | S    | H    |
|---------------------|---|------|------|------|------|
| Observed / Expected | 0 | 2.41 | 1.78 | 2.40 | 9.27 |
