# Supplementary material
Source: PubMed Central journal article supplement (PMC7672785)
Supplement: NIHMS1633743-supplement-08.pdf [file NIHMS1633743-supplement-08.pdf]

## Supplemental Tables

Table S1: Mapping Statistics for WGS data from coffee cup samples, related to STAR Methods and Figure 3.

| Sample Name | # of Total Reads | Percentage of Mapped Reads |
|-------------|------------------|----------------------------|
| IndA-Cup1   | 127,850,309      | 82.36                      |
| IndA-Cup2   | 137,723,180      | 82.14                      |
| IndA-Cup3   | 160,138,265      | 61.50                      |
| IndA-Cup4   | 215,379,662      | 75.98                      |
| IndA-Cup5   | 157,769,539      | 83.56                      |
| IndA-Cup6   | 121,329,654      | 83.54                      |
| IndB-Cup1   | 207,414,742      | 83.58                      |
| IndB-Cup2   | 151,139,298      | 62.65                      |
| IndB-Cup3   | 122,164,133      | 83.76                      |
| IndB-Cup4   | 220,846,681      | 77.93                      |
| IndB-Cup5   | 140,335,759      | 85.26                      |
| IndB-Cup6   | 172,391,527      | 88.97                      |

Table S2: Genotyping statistics of data from coffee cups for different technologies, related to STAR Methods.

| samples   | WGS             |                  |                      | Genotyping Array |                  |                      |           | ONT             |                  |                      |
|-----------|-----------------|------------------|----------------------|------------------|------------------|----------------------|-----------|-----------------|------------------|----------------------|
|           | Called variants | Correct variants | Overlap with RNA-Seq | Called variants  | Correct variants | Overlap with RNA-Seq | Call rate | Called variants | Correct variants | Overlap with RNA-Seq |
| indA-cup1 | 219,887         | 127,389          | 2,843                | 781,807          | 544,932          | 4                    | 84%       | 14              | 0                | 0                    |
| indA-cup2 | 526,798         | 366,539          | 5,764                | 805,034          | 572,318          | 11                   | 86%       | 287             | 9                | 0                    |
| indA-cup3 | 252,452         | 104,710          | 2,314                | 761,566          | 532,966          | 1                    | 81%       | 79              | 14               | 0                    |
| indA-cup4 | 217,840         | 84,418           | 2,323                | 672,857          | 452,859          | 2                    | 72%       | 12              | 4                | 4                    |
| indA-cup5 | 25,822          | 6,984            | 272                  | 808,505          | 600,175          | 5                    | 86%       | 0               | 0                | 0                    |
| indA-cup6 | 56,577          | 30,580           | 601                  | 743,598          | 574,474          | 3                    | 79%       | 0               | 0                | 0                    |
| indA-cup1 | 267,844         | 127,606          | 9,872                | 751,349          | 534,890          | 12                   | 80%       | 122             | 15               | 3                    |
| indA-cup2 | 243,783         | 136,480          | 9,831                | 788,263          | 562,419          | 15                   | 84%       | 0               | 0                | 0                    |
| indA-cup3 | 35,133          | 6,848            | 949                  | 823,790          | 608,231          | 5                    | 88%       | 0               | 0                | 0                    |
| indA-cup4 | 85,613          | 56,716           | 5,014                | 821,752          | 500,897          | 11                   | 88%       | 0               | 0                | 0                    |
| indA-cup5 | 228,913         | 93,103           | 7,450                | 696,447          | 515,111          | 8                    | 74%       | 67              | 12               | 2                    |
| indA-cup6 | 229,167         | 102,538          | 7,734                | 702,263          | 474,838          | 6                    | 75%       | 83              | 6                | 2                    |

Table S3: The functional genomics experiments used in this study with their total coverage, related to STAR Methods and Figure 4.

| Individual | ENCODE ID/Source    | Experiment           | # of Reads  | Read Length |
|------------|---------------------|----------------------|-------------|-------------|
| NA12878    | IkG                 | WGS                  | 757,704,193 | 255         |
| NA12878    | IkG                 | WES                  | 212,461,381 | 76          |
| NA12878    | Rao et al. 2014 (?) | Hi-C exp 1 PE1       | 219,616,072 | 101         |
| NA12878    | Rao et al. 2014     | Hi-C exp 1 PE2       | 220,087,882 | 101         |
| NA12878    | Rao et al. 2014     | Hi-C exp 2 PE1       | 448,843,710 | 101         |
| NA12878    | Rao et al. 2014     | Hi-C exp 2 PE2       | 451,088,484 | 101         |
| NA12878    | Rao et al. 2014     | Hi-C exp 3 PE1       | 536,684,803 | 101         |
| NA12878    | Rao et al. 2014     | Hi-C exp 3 PE2       | 536,101,709 | 101         |
| NA12878    | ENCSR000CVT         | Total RNA-Seq        | 227,501,266 | 202         |
| NA12878    | ENCSR000COQ         | PolyA RNA-Seq        | 267,602,146 | 76          |
| NA12878    | ENCSR000AJA         | Single-cell RNA-Seq1 | 38,377,124  | 100         |
| NA12878    | ENCSR000AJH         | Single-cell RNA-Seq2 | 47,896,396  | 100         |
| NA12878    | ENCSR000AKF         | H3K4me1              | 42,763,056  | 36          |
| NA12878    | ENCSR145XQO         | HDGF                 | 41,626,373  | 101         |
| NA12878    | ENCSR387QUV         | RELB                 | 25,652,682  | 101         |
| NA12878    | ENCSR000DZN         | CTCF-Snyder          | 25,463,397  | 36          |
| NA12878    | ENCSR000AKA         | H3K4me3              | 20,221,959  | 36          |
| NA12878    | ENCSR000DYS         | JUND                 | 18,701,295  | 36          |
| NA12878    | ENCSR000AOW         | H3K79me2             | 16,073,184  | 36          |
| NA12878    | ENCSR000AKE         | H3K36me3             | 15,239,685  | 51          |
| NA12878    | ENCSR000AOV         | H2AFZ                | 14,724,790  | 36          |
| NA12878    | ENCSR000AOX         | H3K9me3              | 14,049,420  | 36          |
| NA12878    | ENCSR000AKB         | CTCF-Broad           | 11,026,086  | 51          |
| NA12878    | ENCSR000BIF         | rnap2                | 10,428,778  | 36          |
| NA12878    | ENCSR000AKC         | H3K27ac              | 10,410,928  | 51          |
| NA12878    | ENCSR000AKG         | H3K4me2              | 9,815,194   | 51          |
| NA12878    | ENCSR000AKI         | H4K20me1             | 9,757,368   | 51          |
| NA12878    | ENCSR000AKD         | H3K27me3             | 8,454,639   | 51          |
| NA12878    | ENCSR000AKH         | H3K9ac               | 7,981,456   | 51          |
| NA12878    | ENCSR000DKV         | CTCF-Iyer            | 7,614,943   | 35          |
| NA12878    | ENCSR000BGD         | rnap2                | 7,516,461   | 36          |
| NA12878    | ENCSR000BGR         | PBX3                 | 6,119,046   | 36          |
| NA19239    | ENCSR018VOS         | ChIA-PET (H3K4me1)   | 335,232,702 | PE 101      |
| NA19239    | ENCSR332ZHA         | ChIA-PET (H3K4me2)   | 289,328,492 | PE 101      |
| NA19239    | ENCSR952NXC         | ChIA-PET (H3K4me3)   | 322,739,907 | PE 101      |
| NA19239    | ENCSR761FUE         | ChIA-PET (H3K27ac)   | 271,351,477 | PE 101      |
| NA19239    | ENCSR000DLE         | CTCF-Iyer            | 9,999,915   | 36          |
| NA19238    | ENCSR823TEV         | ChIA-PET (H3K4me1)   | 286,387,111 | PE 101      |
| NA19238    | ENCSR380UPB         | ChIA-PET (H3K4me2)   | 294,881,881 | PE 101      |
| NA19238    | ENCSR029IXY         | ChIA-PET (H3K27ac)   | 289,564,091 | PE 101      |
| NA19238    | ENCSR527RXH         | ChIA-PET (RAD21)     | 339,707,301 | PE 101      |
| NA19238    | ENCSR000DLD         | CTCF-Iyer            | 16,368,229  | 36          |
| NA12812    | ENCSR281KLF         | Repli-Seq            | 8,082,874   | 36          |
| NA12813    | ENCSR834FTN         | Repli-Seq            | 9,999,915   | 36          |
| NA10847    | ENCSR000DYO         | POLR2A               | 6,476,857   | 28          |
| NA10847    | ENCSR000DYM         | RELA                 | 19,376,644  | 28          |
| NA18505    | ENCSR000EAU         | POLR2A               | 28,951,453  | 28          |
| NA18505    | ENCSR000EAW         | RELA                 | 22,274,656  | 28          |
| NA18526    | ENCSR000EAY         | POLR2A               | 5,058,348   | 28          |
| NA18526    | ENCSR000EBA         | RELA                 | 6,353,939   | 28          |
| NA18951    | ENCSR000EBC         | POLR2A               | 8,729,371   | 28          |
| NA18951    | ENCSR000EBD         | RELA                 | 5,514,493   | 28          |
| NA19099    | ENCSR000EBG         | POLR2A               | 7,759,177   | 28          |
| NA19099    | ENCSR000EBI         | RELA                 | 11,961,302  | 28          |

Table S4: p-tools performance and associated file sizes, related to Figure 7 and STAR Methods

| <b>Experiment</b>                    | Total RNA-Seq  | PolyA RNA-Seq  | ChIP-Seq (CTCF) | ChIP-Seq (H3K4me1) |
|--------------------------------------|----------------|----------------|-----------------|--------------------|
| <b>BAM size (bytes)</b>              | 35,219,346,385 | 16,301,017,652 | 954,993,667     | 2,230,202,265      |
| <b>pBAM size (bytes)</b>             | 31,986,293,946 | 14,057,962,755 | 876,237,603     | 1,838,044,304      |
| <b>CRAM size (bytes)</b>             | 21,317,709,703 | 10,084,587,074 | 425,193,485     | 1,120,941,477      |
| <b>pCRAM size (bytes)</b>            | 20,436,579,905 | 966,7758,517   | 378,736,942     | 883,158,959        |
| <b>.diff size (bytes)</b>            | 623,943,745    | 260,978,063    | 6,991,519       | 19,438,692         |
| <b>BAM to .diff compression</b>      | 99.98%         | 99.98%         | 99.99%          | 99.99%             |
| <b>CRAM to .diff compression</b>     | 96.94%         | 97.30%         | 99.98%          | 99.98%             |
| <b>BAM+hg to pBAM+.diff CPU time</b> | 23:21:17       | 17:05:26       | 00:37:11        | 01:08:00           |
| <b>pBAM+.diff+hg to BAM CPU time</b> | 12:34:23       | 04:21:05       | 00:27:47        | 00:46:50           |
