# Supplementary material
Source: PubMed Central journal article supplement (PMC7672785)

Case P-P :

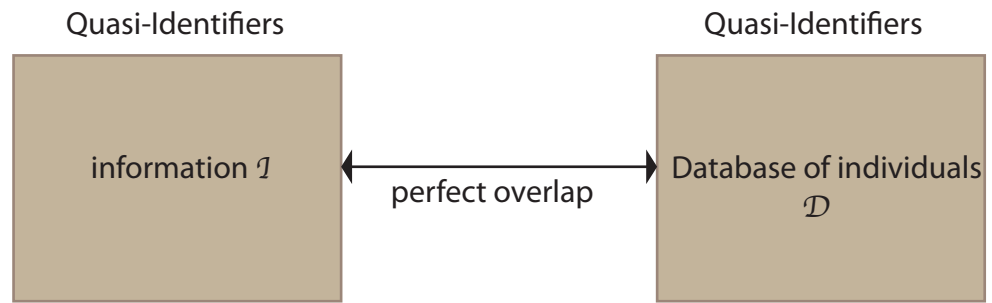

Case N-P

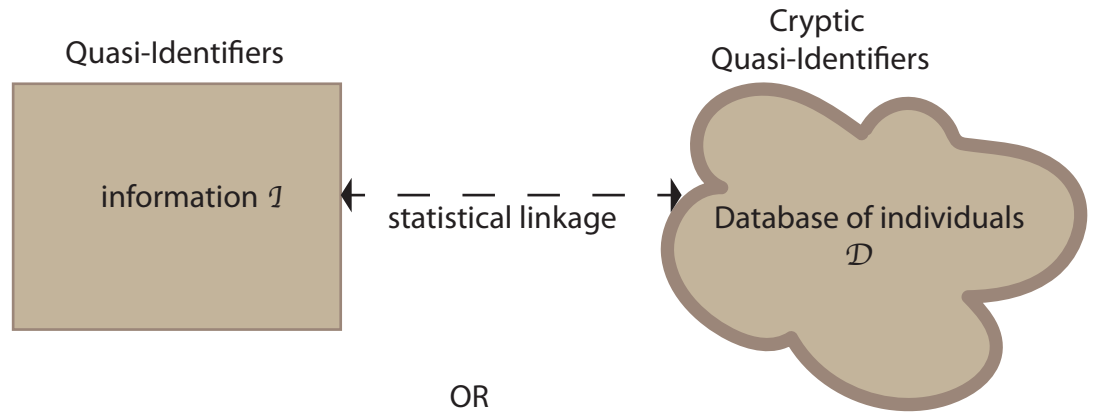

or

OR

P-N :

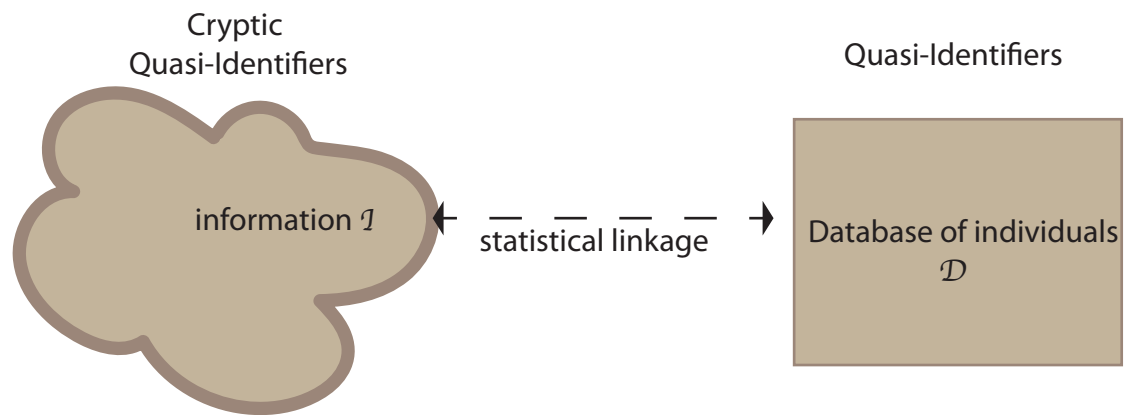

Case N-N:

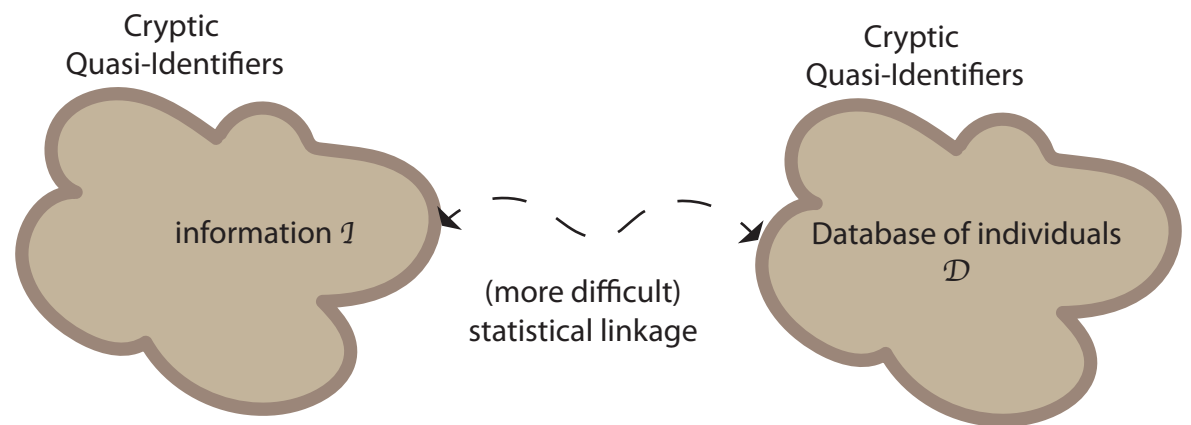

Supplement: NIHMS1633743-supplement-01.pdf [file NIHMS1633743-supplement-01.pdf]

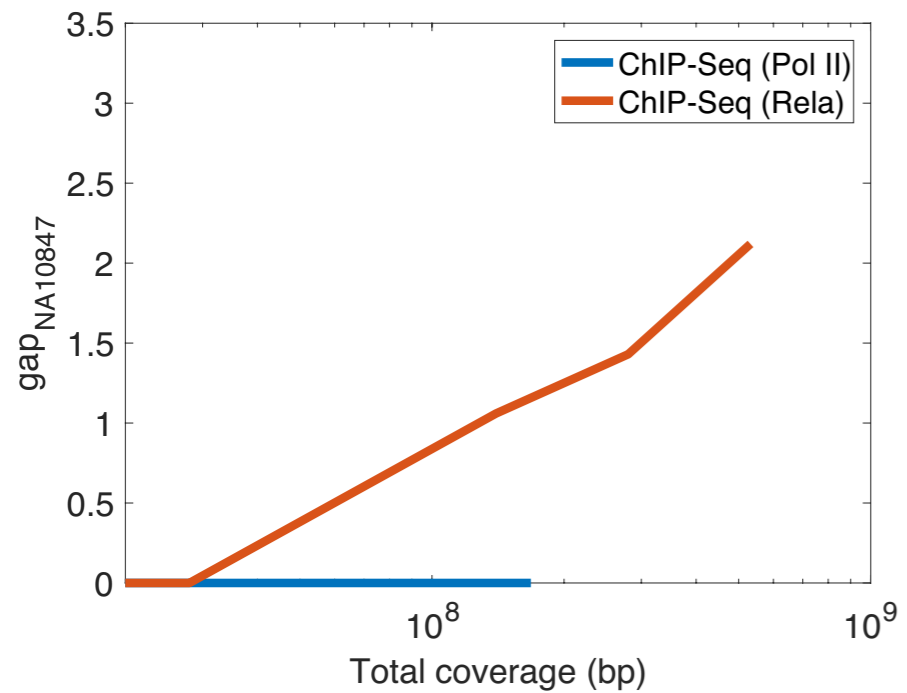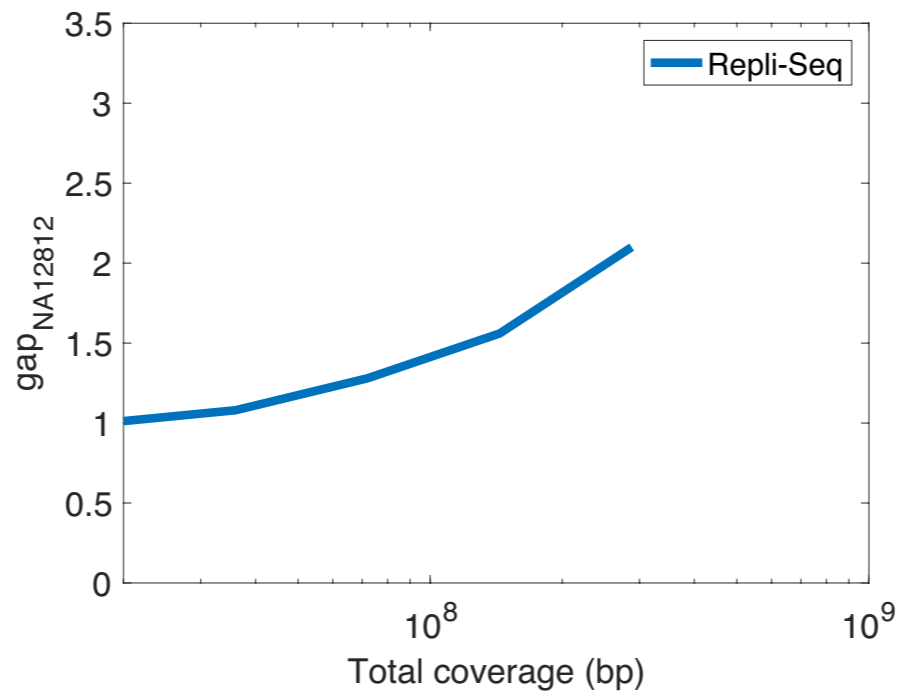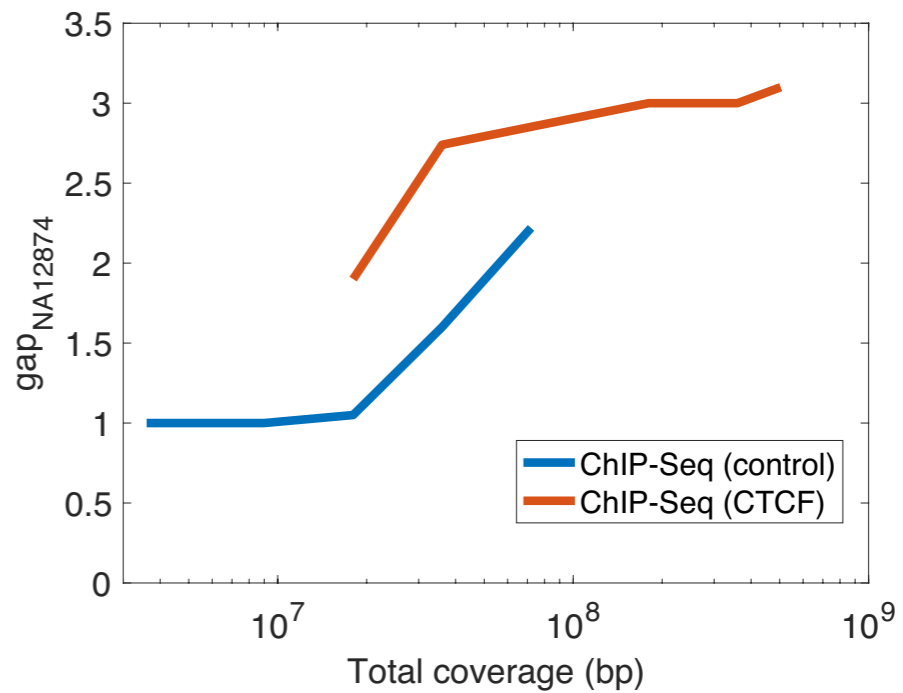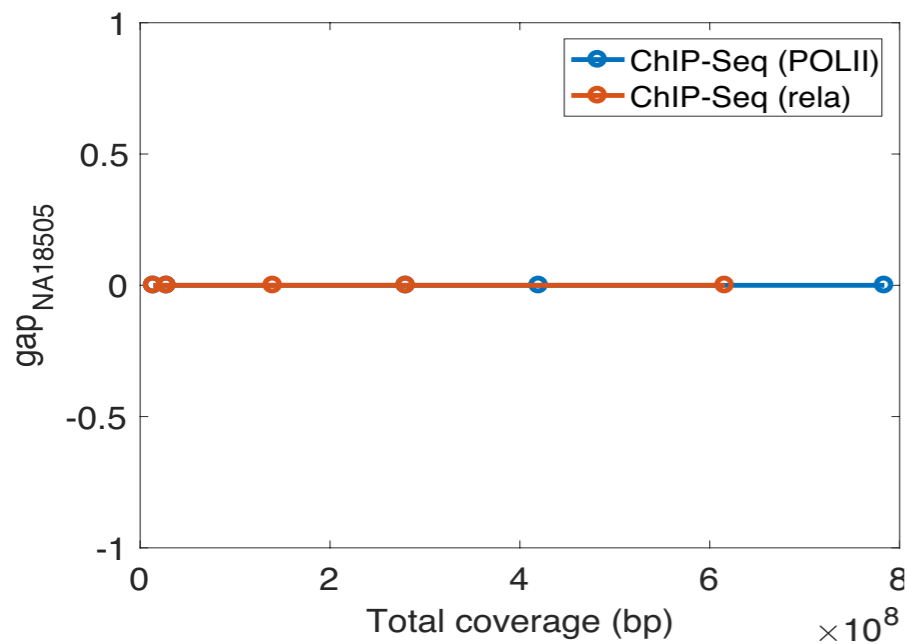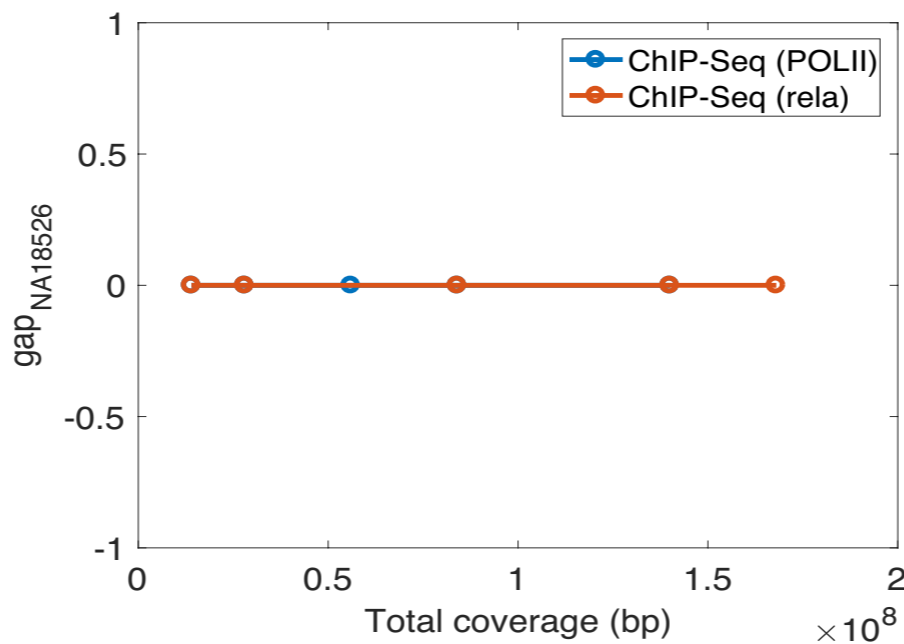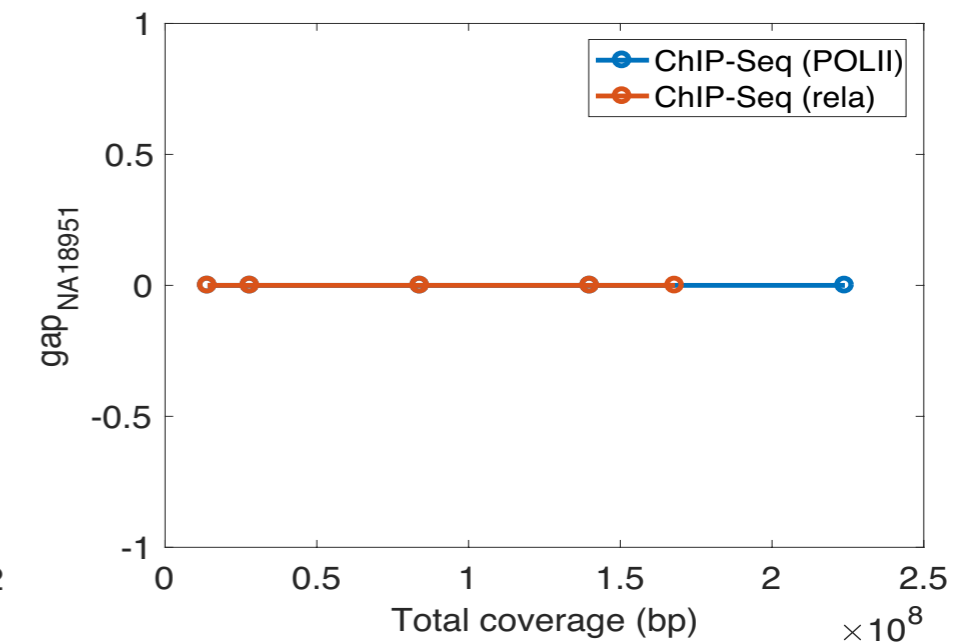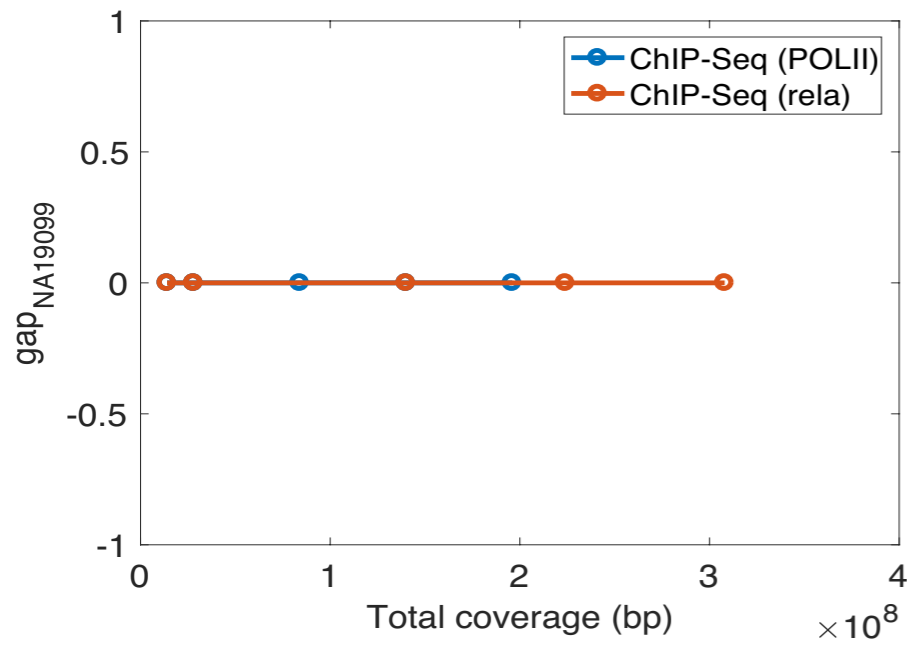

Supplement: NIHMS1633743-supplement-02.pdf [file NIHMS1633743-supplement-02.pdf]

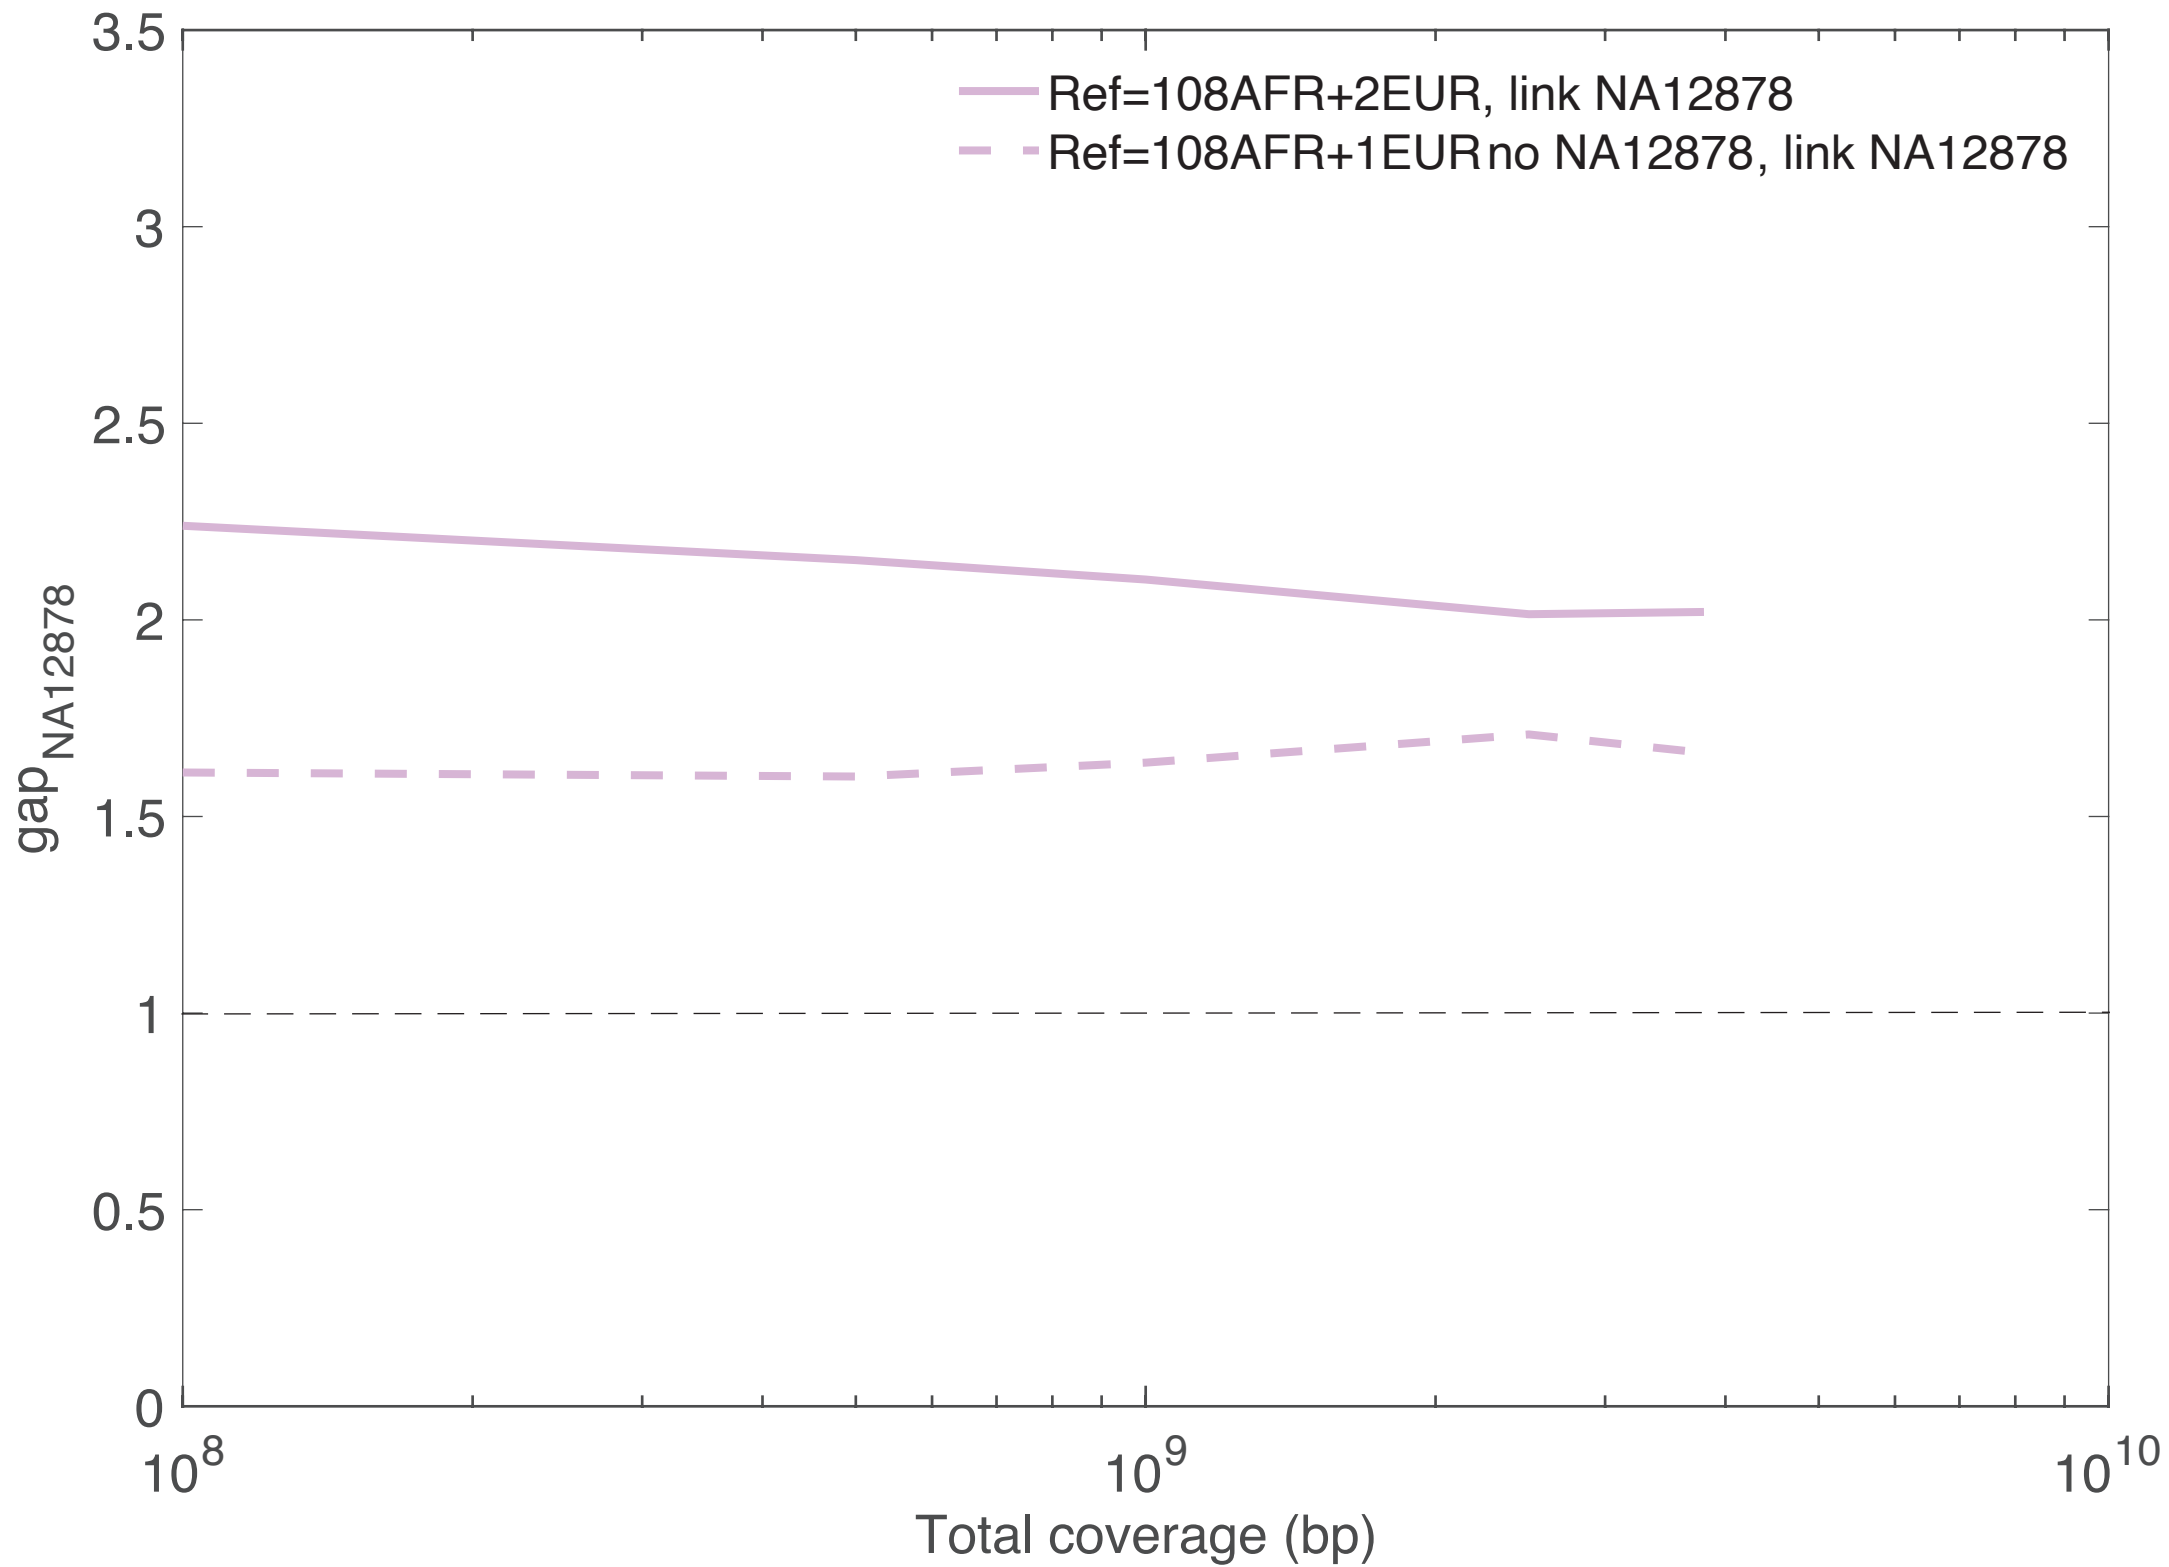

Supplement: NIHMS1633743-supplement-03.pdf [file NIHMS1633743-supplement-03.pdf]

| BAM                | pBAM        |                                                                                       |
|--------------------|-------------|---------------------------------------------------------------------------------------|
| 76M                | 76M         |    |
| 9M1X66M            | 76M         |    |
| 5S71M              | 76M         |    |
| 22M8I46M           | 76M         |    |
| 12M2D62M           | 76M         |   |
| 3S15M3I40M2D13M    | 76M         |  |
| 25H30M2X5M3D11M    | 76M         |  |
| 30M1000N46N        | 30M1000N46N |  |
| 3S30M1000N15M2D26M | 30M1000N46N |  |

Supplement: NIHMS1633743-supplement-04.pdf [file NIHMS1633743-supplement-04.pdf]
